# Supplementary material
Source: PubMed Central journal article supplement (PMC9051146)

Fig 3 C tPA 0 1 3 h

GFAP

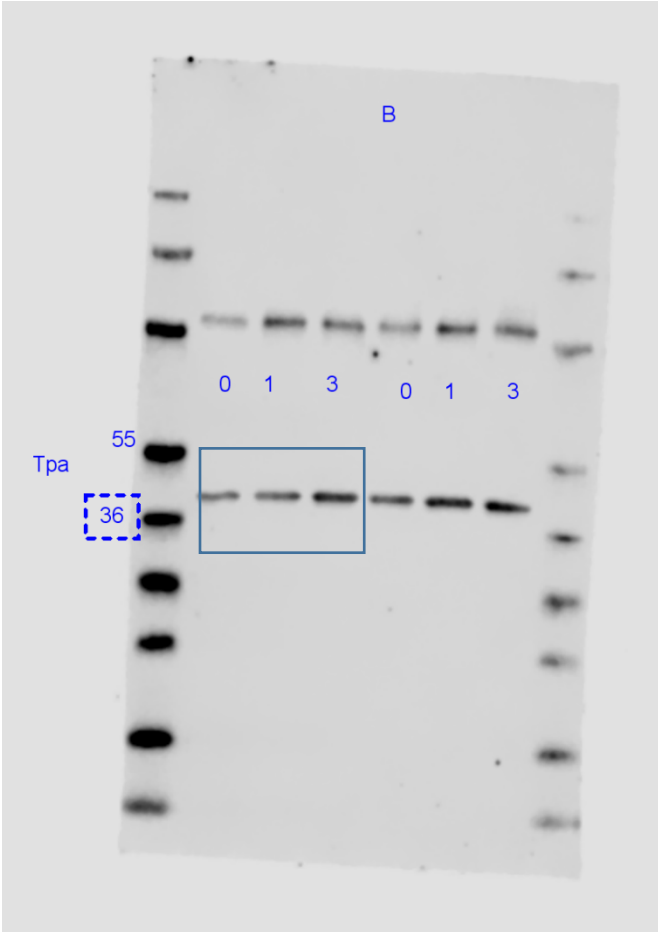

Actin

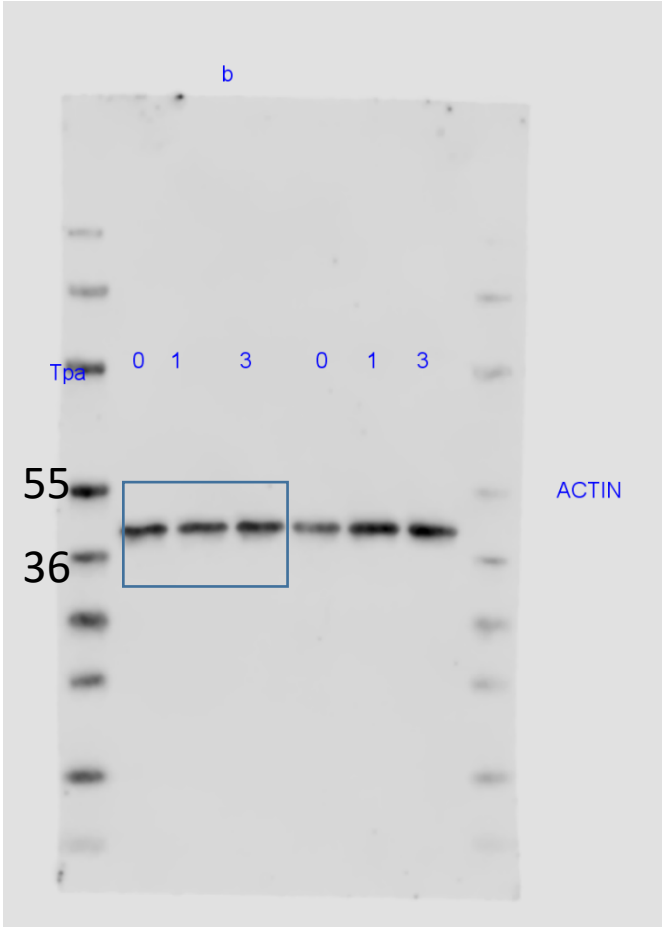

Fig 3 E itPA 3 h

Actin

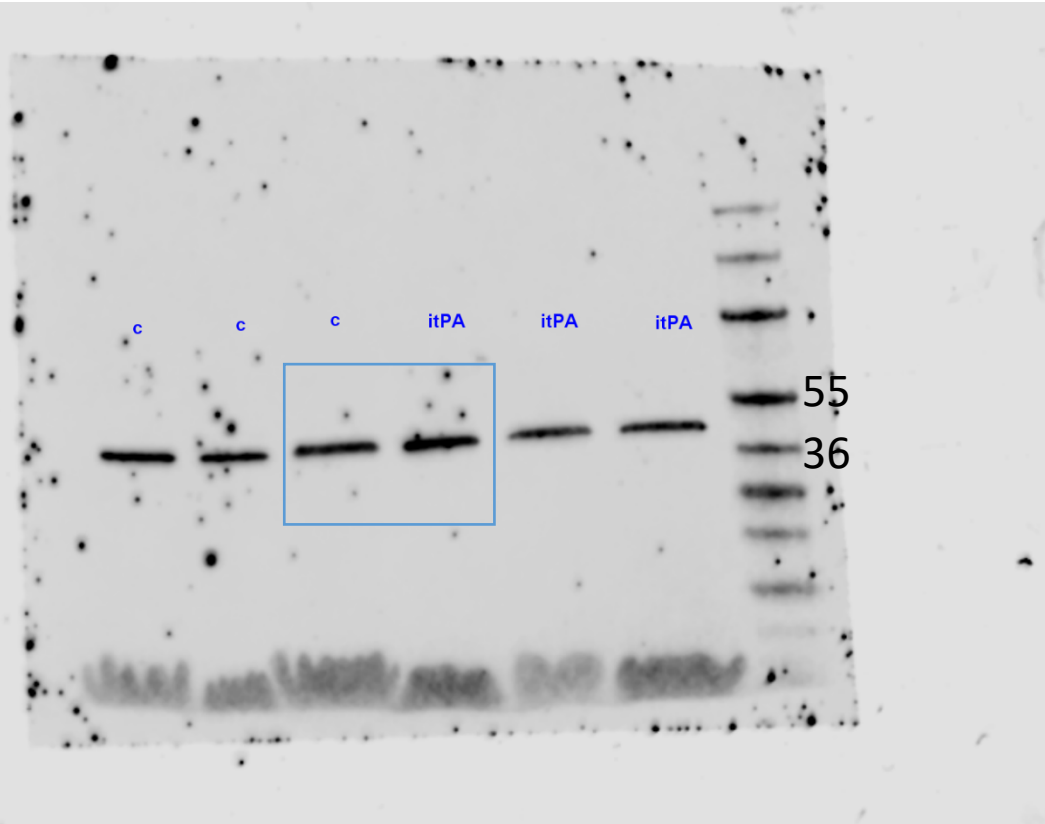

GFAP

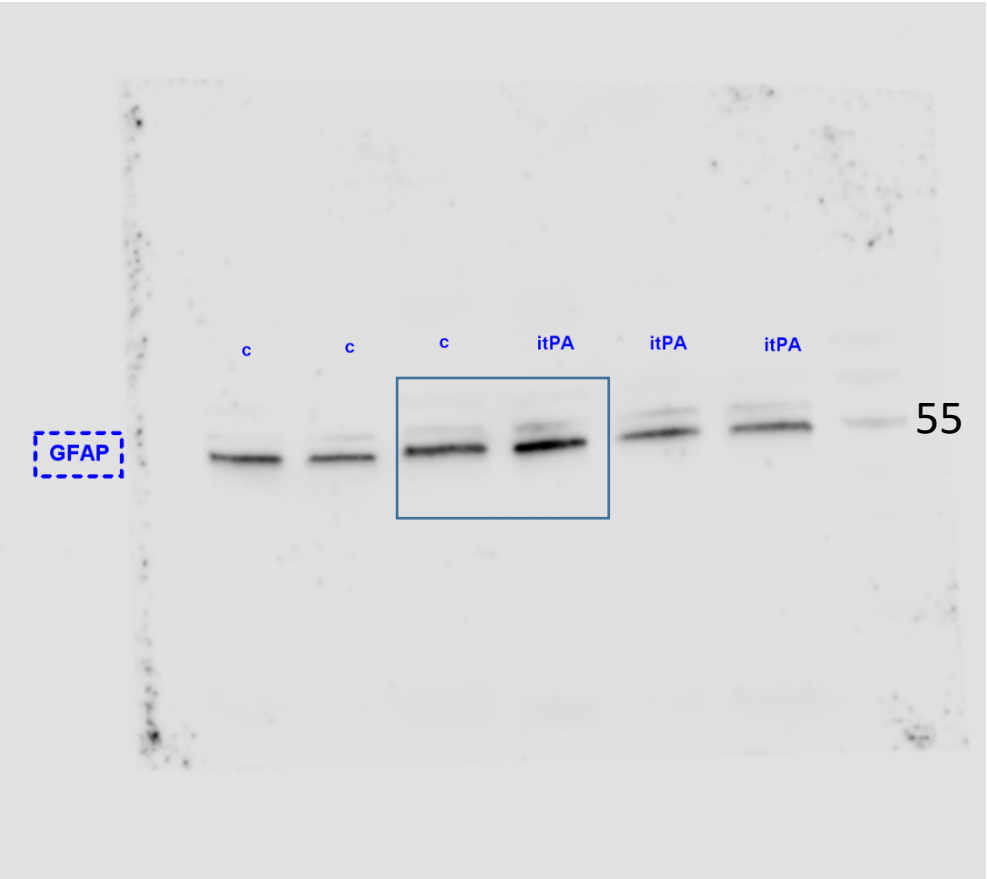

Fig 4 A tPA 3 h PCR tnf alpha

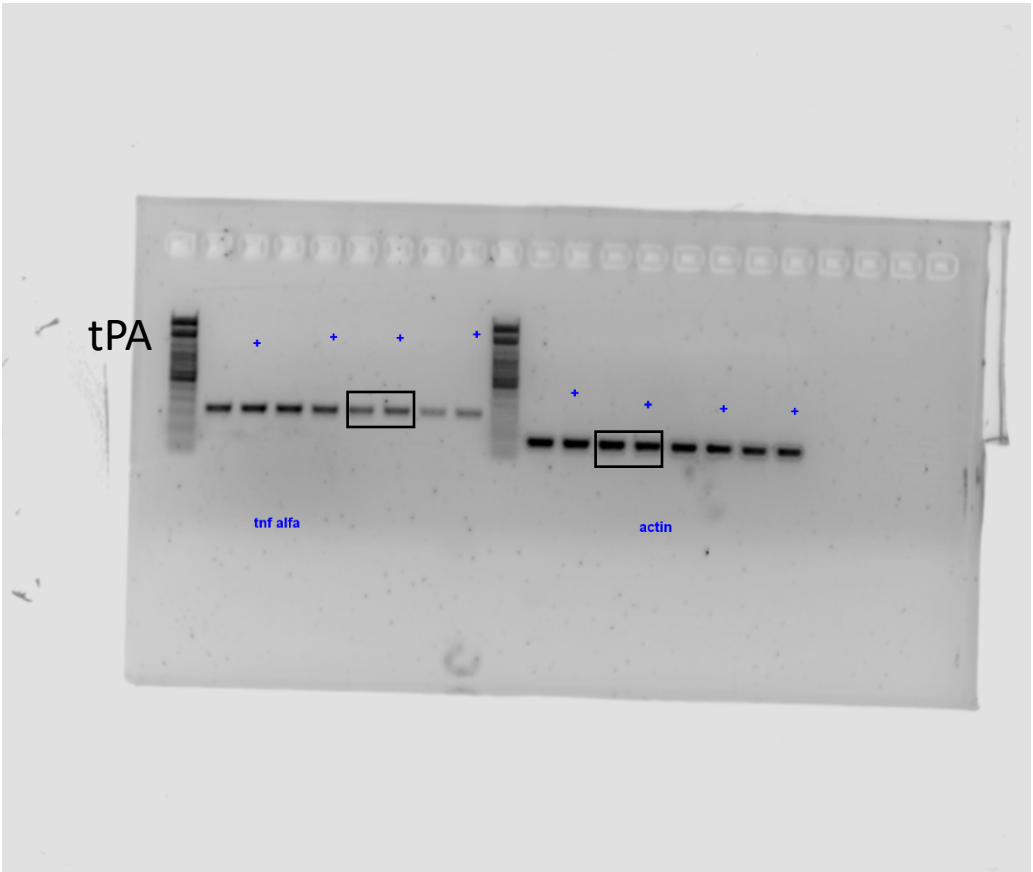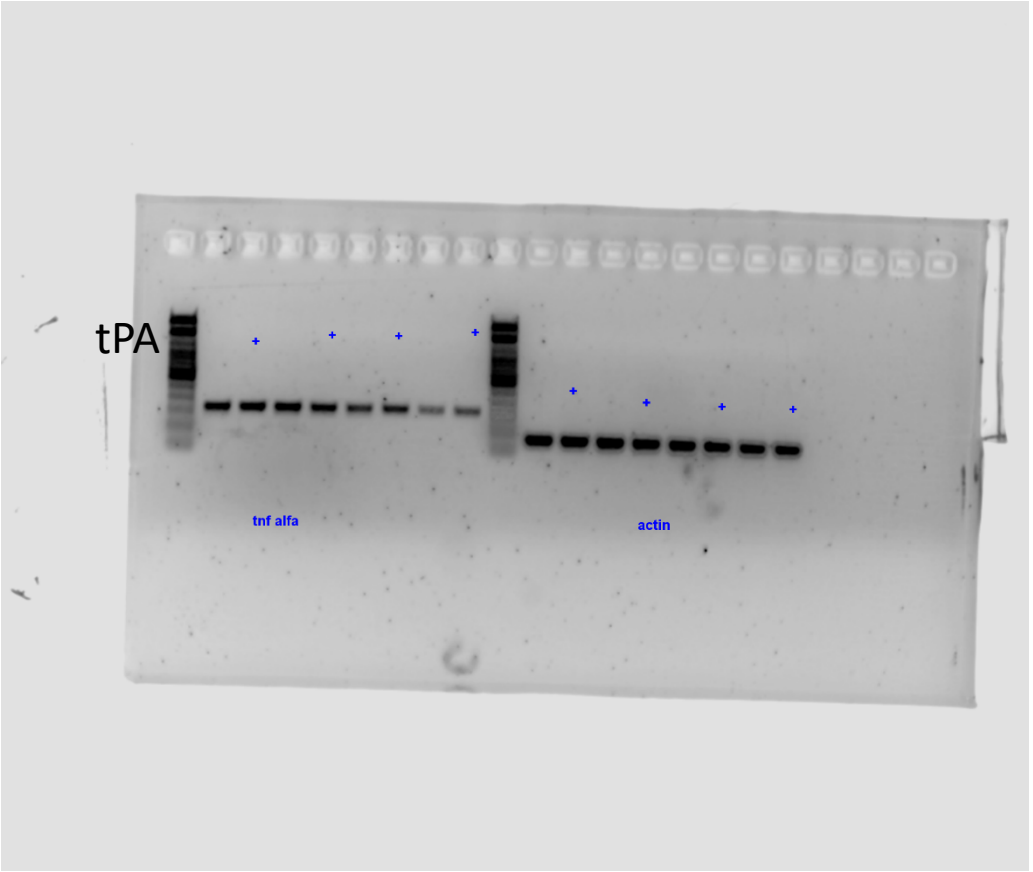

Fig 4 C tPA 3 h +- anti TNF alpha

GFAP

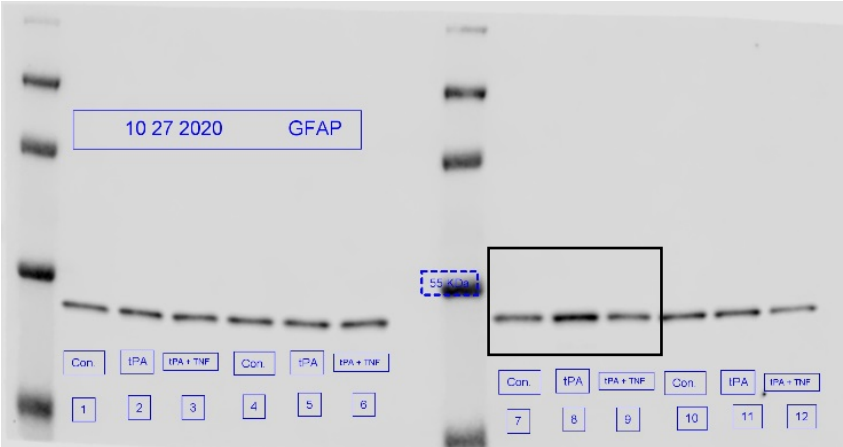

Actin

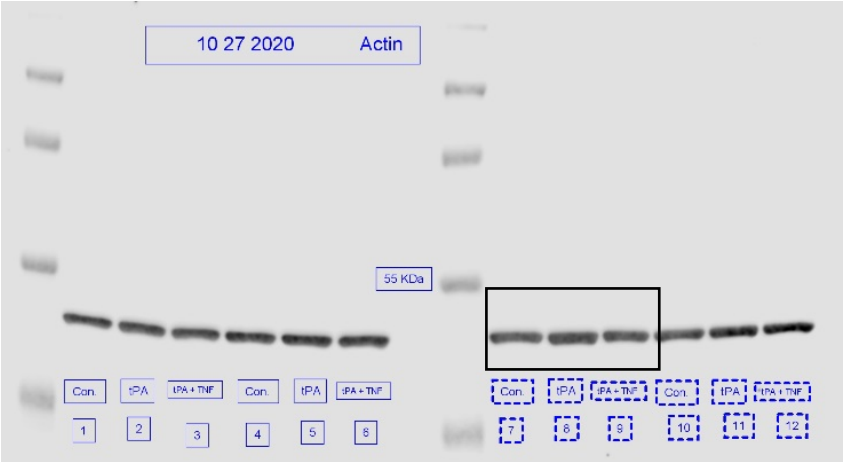

Fig 5 A tPA 3 h AQ 4

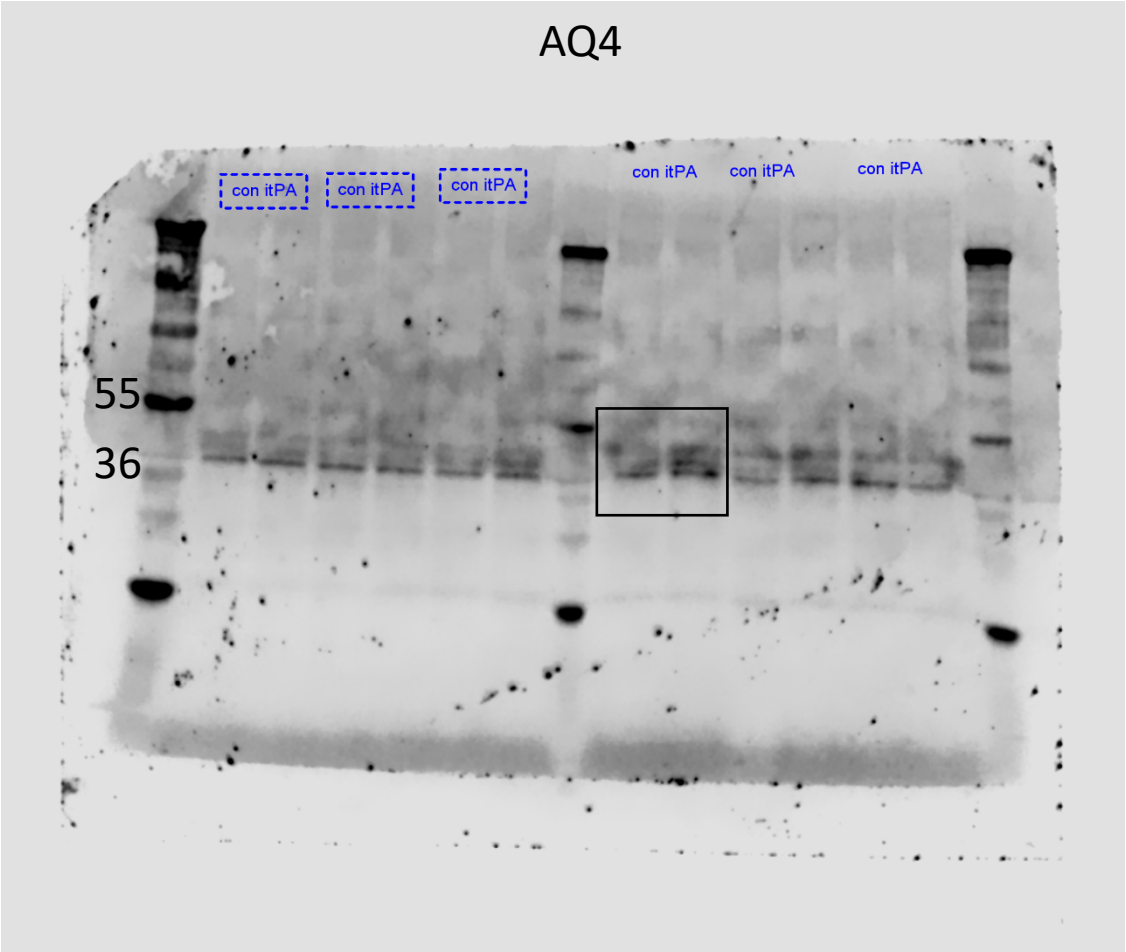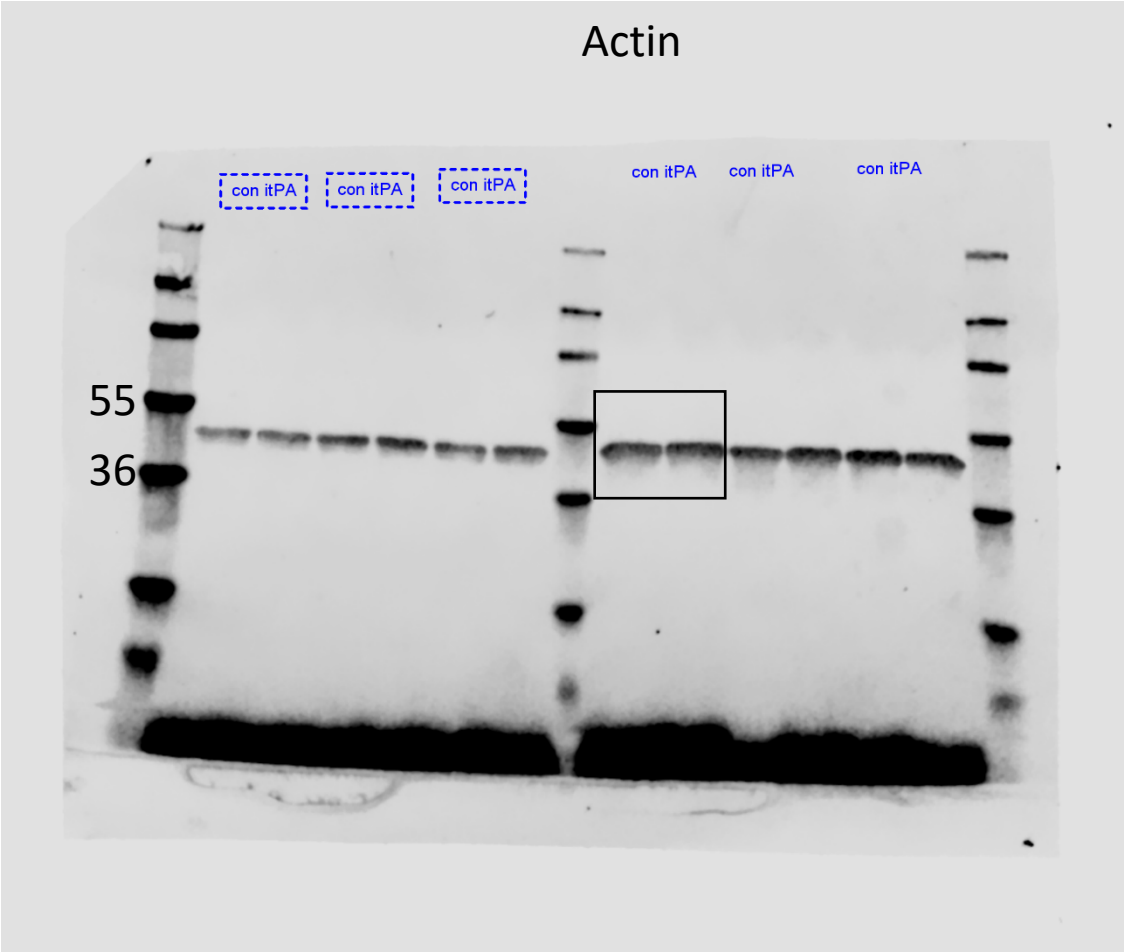

Supplement: sj-pdf-1-jcb-10.1177_0271678X211060395.pdf [file sj-pdf-1-jcb-10.1177_0271678X211060395.pdf]
